## Cardioprotective effect of resveratrol, a natural antioxidant derived from grapes

Li-Man Hung<sup>a</sup>, Jan-Kan Chen<sup>b</sup>, Shiang-Suo Huang<sup>a</sup>, Ren-Shen Lee<sup>c</sup>, Ming-Jai Su<sup>a,\*</sup>

<sup>a</sup>*Institute of Pharmacology, College of Medicine, National Taiwan University, No. 1, Sec. 1, Jen-Ai Road, Taipei, Taiwan*

<sup>b</sup>*Department of Physiology, College of Medicine, Chang Gung University, Taoyuan, Taiwan*

<sup>c</sup>*Center of General Studies, Chang Gung University, Taoyuan, Taiwan*

Received 28 October 1999; accepted 25 April 2000

### Abstract

**Background:** The major objective of the present study was to examine the cardioprotective effect of resveratrol, an antioxidant presents in red wines, in the rat after ischemia and ischemia–reperfusion (I–R). **Methods:** The left main coronary artery was occluded for 30 or 5 min followed by a 30-min reperfusion in anesthetized rats. Animals were preinfused with and without resveratrol before occlusion and the severity of ischemia- and I–R-induced arrhythmias and mortality were compared. **Results:** Resveratrol pretreatment had no effect on ischemia-induced arrhythmias nor on mortality. In contrast, a dramatic protective effects were observed against I–R-induced arrhythmias and mortality. Resveratrol pretreatment both reduced the incidence and duration of ventricular tachycardia (VT) and ventricular fibrillation (VF). During the same period, resveratrol pretreatment also increased nitric oxide (NO) and decreased lactate dehydrogenase levels in the carotid blood. **Conclusions:** Resveratrol is a potent antiarrhythmic agent with cardioprotective properties in I–R rats. The cardioprotective effects of resveratrol in the I–R rats may be correlated with its antioxidant activity and upregulation of NO production. © 2000 Elsevier Science B.V. All rights reserved.

*Keywords:* Arrhythmia, mechanisms; Free radicals; Ischemia; Nitric oxide; Reperfusion

### 1. Introduction

The Southern French have a very low mortality rate due to coronary heart disease (CHD) despite having a high-fat diet and smoking habits. This so-called ‘French paradox’ has been attributed in part to wine consumption, particularly red wines [1,2]. Resveratrol (3,5,4′-trihydroxystilbene), a polyphenol present in red wine, has been thought to be responsible for the cardiovascular benefits associated with moderate wine consumption [3]. In purified or synthetic form, resveratrol has been shown to reduce the synthesis of lipids in rat liver [4], to inhibit the synthesis of eicosanoids in rat leukocytes [5], to interfere with arachidonate metabolism [6], to inhibit platelet activation/aggregation [7], to inhibit the activity of some protein kinases [8], to exert a strong inhibitory effect on reactive

oxygen species produced by human polymorphonuclear leukocytes [9], and is an antioxidant more powerful than vitamin E in preventing LDL oxidation [10]. However, because of its unpredictable effect on other organ systems, it is unwise to recommend a glass or two of wine to someone with a known predisposition to CHD.

It is now well established that cardiomyocytes cannot survive under severe ischemic conditions for prolonged period. Regardless of its cause (thrombosis, arterial spasm, atheroma, etc.), ischemia induces an imbalance between oxygen supply and demand for the metabolizable substrates in the cardiac tissue, rapidly leading to functional, metabolic, electrophysiological, and morphological alterations of the myocardium, and may eventually cause cellular necrosis [11].

Reperfusion of the ischemic myocardium is associated with a host of distinctive pathophysiologic derangements, including reperfusion arrhythmias, transient mechanical

\*Corresponding author. Tel.: +886-2-2356-2221; fax: +886-2-2391-5602.

E-mail address: mjsu@ha.mc.ntu.edu.tw (M.-J. Su).

Time for primary review 25 days.

dysfunction or ‘myocardial stunning’, and cell death [12]. The underlying pathophysiological mechanisms have not been fully elucidated. It has been suggested that an overproduction of reactive oxygen intermediates (superoxide anion, hydroxyl radical, hydrogen peroxide, singlet oxygen) [13], and intracellular calcium overload or redistribution [14] might be involved. Whether there is a causal relationship between the overproduction of reactive oxygen derivatives and I–R injury is a question with physiological and medical significance. If such a relationship exists, would then pretreatment of ischemic heart with antioxidant before reperfusion be beneficial in decreasing the risk of CHD mortality? The antioxidant property of resveratrol and its capacity to stimulate endothelial NO production [15] prompted us to investigate whether it is capable of exerting any protective effects in face of I–R injury. Most of the studies thus far have focused on the beneficial effects of resveratrol in the prevention of atherosclerosis and coronary heart disease, and little has been considered for its possible use as a therapeutic drug in treating acute scenarios such as I–R injury. In the present study, we evaluate the possible protective effect of resveratrol on ischemia or I–R injury in anesthetized rat hearts subjected to transient regional ischemia. Our results show that preinfusion of resveratrol effectively suppresses I–R-induced arrhythmias and cardiac cell damage and these effects may be attributable to its antioxidant activity and upregulation of NO production.

## 2. Methods

### 2.1. Materials

*trans*-Resveratrol (*trans*-3,4',5-trihydroxystilbene), a natural antioxidant present in red wine, was synthesized as described in [16], and purified by silica-gel column chromatography (ethylacetate–*n*-hexane, 1:2, v/v) and recrystallization (ethylacetate–*n*-hexane, 1:1, v/v). 1,1-Diphenyl-2-picrylhydrazyl (DPPH) and sodium nitrite were purchased from Sigma (St. Louis, Mo. USA). Vanadium (III) was obtained from Merck (Darmstadt, Germany).

### 2.2. 1,1-Diphenyl-2-picrylhydrazyl test

An ethanolic solution of the stable nitrogen centered free radical DPPH (100  $\mu$ M) was incubated with the test compounds and the absorbance was monitored spectrophotometrically at 517 nm. The concentration ( $IC_{0.200}$ ) of the test compounds that induced a decrease of 0.200 in absorbance during a 30-min observation period was taken as the free radical-scavenging potency [17].

### 2.3. Animals

All studies were performed in accordance with guide-

lines described in the NIH *Guide for the Care and Use of Laboratory Animals* (DHHS publication No. [NIH] 85-23, revised 1996). Male Sprague–Dawley rats (200–300 g b.wt.) underwent myocardial ischemia by a temporary occlusion of the left main coronary artery as previously described [18]. Briefly, rats were anesthetized with urethane (1.25 g/kg i.p.) and placed on an operating table. Polyethylene catheters (PE 50) were inserted from internal carotid artery into the common carotid artery for the measurement of blood pressure and heart rate. After tracheotomy, the animals were ventilated with room air by a respirator for small rodents (model 131, NEMI, USA) with a stroke volume of  $\approx 12$  ml/kg body weight and at a rate of 60 strokes/min to maintain normal  $pO_2$  and pH parameters. The chest was opened and the ribs were gently spread. The heart was quickly expressed out of the thoracic cavity, inverted and a 7/0 silk ligature was placed under the left main coronary artery. The heart was repositioned in the chest and the animal was allowed to recover for 15 min. A small plastic snare formed from a Portex P-270 cannula was threaded through the ligature and placed in contact with the heart. Tightening the ligature could then occlude the artery and reperfusion was achieved by releasing the tension applying to the ligature (Operated groups). Sham operated animals underwent all the above described surgical procedures, apart from the fact that the 7/0 silk, passing around the left coronary artery, was not tied (Sham groups). Animals were infused with a bolus of resveratrol ( $2.3 \times 10^{-7}$ ,  $2.3 \times 10^{-6}$ ,  $2.3 \times 10^{-5}$  g/kg) or vehicle (dimethyl sulfoxide–0.9% NaCl, 1:10<sup>3</sup>; v/v) from a jugular vein 15 min before coronary occlusion. Coronary artery was occluded for 30 min or 5 min followed by 30 min reperfusion and animals were randomized in the following groups: (1) sham+vehicle; (2) sham+resveratrol ( $2.3 \times 10^{-5}$  g/kg); (3) operated+vehicle; (4) operated+resveratrol ( $2.3 \times 10^{-7}$  g/kg); (5) operated+resveratrol ( $2.3 \times 10^{-6}$  g/kg); (6) operated+resveratrol ( $2.3 \times 10^{-5}$  g/kg).

Before and during the ischemia or reperfusion period, heart rate (HR), blood pressure (BP) and ECG changes were recorded on a personal computer with a WAVE FORM data analysis software (MacLab data acquisition system, AD Instruments, Castle Hill, NSW, Australia). Ventricular ectopic activity was evaluated according to the diagnostic criteria advocated on the Lambeth Convention [19]. The number of ventricular premature beats (VPB) and the incidence and duration of ventricular tachyarrhythmias, including VT and VF, in surviving animals were determined.

### 2.4. Plasma LDH and NO analysis

Cellular damage was evaluated by measuring the plasma LDH. The blood samples were drawn from the carotid artery at the end of reperfusion, collected in heparinized tubes. The blood was kept at 4°C until it was centrifuged at

2000 g for 15 min. The plasma was recovered and aliquots were used for determination of LDH activity with a commercial kit from Sigma.

The deproteinized plasma samples were frozen and kept until analysis. For measurement of NO we employed the NO/ozone chemiluminescence technique (280 NOA™, Sievers Instruments, Boulder, CO, USA). This method has previously been described in detail [20]. Briefly, the detection of plasma NO level is based on its reaction with ozone, which leads to the emission of red light ( $\text{NO} + \text{O}_3 \rightarrow \text{NO}_2^* + \text{O}_2$ ;  $\text{NO}_2^* \rightarrow \text{NO}_2 + h\nu$ ). The photons from this reaction are detected and transformed to an electrical signal by a photomultiplier tube (PMT). Due to the use of filters in front of the PMT, NO/O<sub>3</sub> chemiluminescence recorded with the Sievers NOA 280 is highly specific for NO. The current from the PMT is A/D converted and fed into a PC running the ASYST software (Sievers NO Analysis Liquid Program, USA). The amount of light produced by NO/O<sub>3</sub> chemiluminescence is proportional to the amount of NO sampled. Hence, the calculated area under the curve of the PMT current for each determination is proportional to the amount of NO. This was verified before each experiment by standard curves (1, 5, 10, 20, 40 and 100  $\mu\text{mol/l}$ ) which were produced using freshly prepared solutions of sodium nitrite in distilled water, which was reduced to NO in an equimolar manner by the reducing agent. We chose to measure the level of nitrite or nitrate in blood samples, by using a reaction vessel containing a reducing system (Vanadium (III) dissolved in 1 M HCl), to which the sample was injected and NO was generated from nitrite or nitrate in an equimolar manner. A continuous stream of Helium (99.999%) purged the resultant NO from the reaction vessel to the chemiluminescence chamber.

### 2.5. Statistics

Data were expressed as mean  $\pm$  standard error (S.E.). Mann–Whitney rank-sum test was used to analyze the differences in the duration of VT and VF between vehicle and drug treated groups. The BP and HR changes between vehicle and drug infused rats in arrhythmia study were analyzed by ANOVA (analysis of variance) followed by Bonferroni's test. The difference in the percentage incidence of VT, VF and mortality rate was analyzed with a  $\chi^2$  test. DPPH radical scavenging activity was evaluated by paired Student's *t*-test. The IC<sub>0.200</sub> value was obtained by regression analysis. Plasma NO and LDH levels were statistically evaluated by unpaired Student's *t*-test.  $P < 0.05$  was considered to be statistically significant.

## 3. Results

### 3.1. Interaction of resveratrol with stable free radical DPPH

In the DPPH assay, the free radical scavenging activity

of resveratrol was expressed as IC<sub>0.200</sub>. The decrease in optical absorbance at 517 nm after addition of resveratrol was monitored following the trapping of the unpaired electron of DPPH. Resveratrol scavenged DPPH in a concentration-dependent manner with an IC<sub>0.200</sub> of 7.0  $\mu\text{M}$ .

### 3.2. Infusion of resveratrol had no effect on hemodynamic parameters

Jugular vein bolus injection of resveratrol did not modify the diastolic, systolic blood pressure and heart rate in rats (Fig. 1). No significant difference was seen among

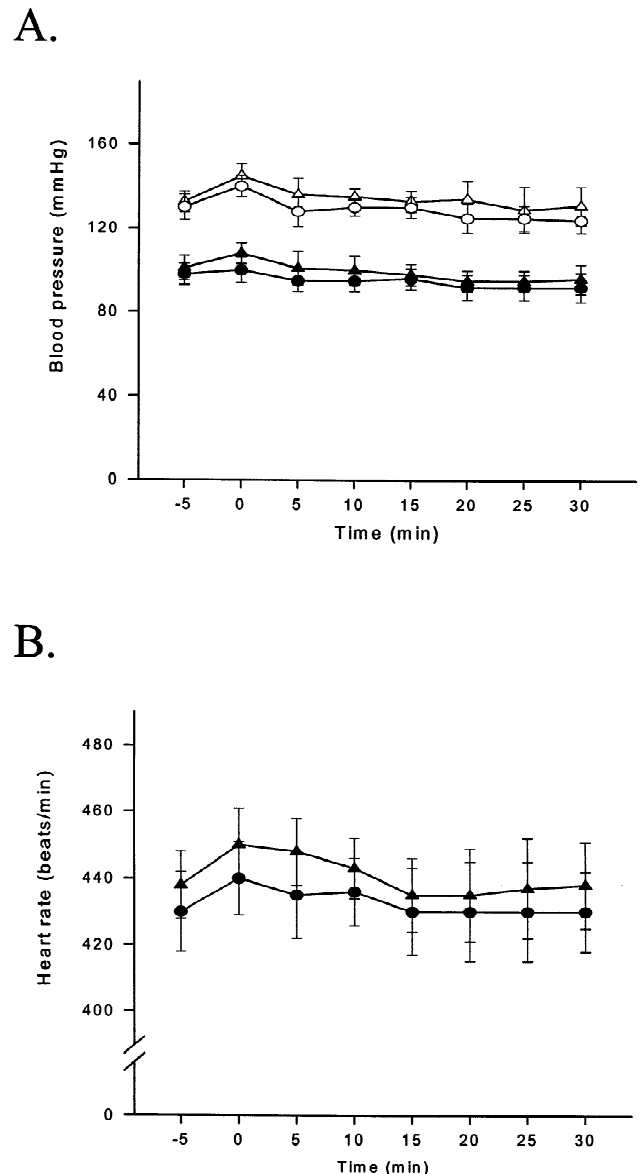

Fig. 1. (A) Systolic (open symbols) and diastolic (closed symbols) blood pressure in vehicle (0.1% DMSO) (○, ●) and  $2.3 \times 10^{-5}$  g/kg (△, ▲) resveratrol-infused rats. (B) Heart rate (HR) in vehicle (●),  $2.3 \times 10^{-5}$  g/kg (▲) resveratrol-infused rats. The differences between vehicle and resveratrol infused animals were not statistically significant (ANOVA).

Table 1  
Effect of resveratrol on ischemia (30 min) induced arrhythmias in anesthetized rats<sup>a</sup>

|                                           | Ventricular tachycardia |              | Ventricular Fibrillation |              | Mortality (%) |
|-------------------------------------------|-------------------------|--------------|--------------------------|--------------|---------------|
|                                           | Incidence (%)           | Duration (s) | Incidence (%)            | Duration (s) |               |
| Sham                                      |                         |              |                          |              |               |
| Vehicle (4)                               | –                       | –            | –                        | –            | –             |
| Resveratrol $2.3 \times 10^{-5}$ g/kg (4) | –                       | –            | –                        | –            | –             |
| Operated                                  |                         |              |                          |              |               |
| Vehicle (7)                               | 100                     | 38.2±8.5     | 63                       | 15.6±10.5    | 38            |
| Resveratrol $2.3 \times 10^{-5}$ g/kg (6) | 100                     | 36.9±10.5    | 50                       | 20.9±11.1    | 33            |

<sup>a</sup> Vehicle is 0.1% DMSO in normal saline; (n), number of experiments; values for duration of VT and VF are shown as the mean±S.E..

control and drug groups ( $2.3 \times 10^{-5}$  g/kg resveratrol, n = 4).

### 3.3. Ischemia-induced rhythm disturbances

Occlusion of the coronary artery induced severe ventricular arrhythmias in animals of the control (operated+vehicle) group. It started to occur at 6–7 min, peaked at 10 min, and normally subsided by approximately 15 min after occlusion. Pretreatment with resveratrol had no effect on ischemia-induced arrhythmias nor on mortality (Table 1).

### 3.4. Reperfusion-induced rhythm disturbances

The severity of reperfusion-induced arrhythmias is critically dependent on the duration of the preceding period of ischemia. Thus, we selected a 5-min period of ischemia followed by a 30-min period of reperfusion; this protocol could produce the highest incidence of rhythm disturbance. The same I–R protocol has been reported by Manning et al. [21] and Kusama et al. [22]; both groups showed that the arrhythmia induced is related with superoxide anion generation. Table 2 shows that in the control group (operated+vehicle), about 80% of the animals exhibited VF in the reperfusion period. Some of the VF converted spontaneously to VT or normal sinus rhythm. As a consequence, only 50% of them died. In

animals preinfused with resveratrol at  $2.3 \times 10^{-6}$  and  $2.3 \times 10^{-5}$  g/kg, a drastic reduction in mortality and in the incidence and duration of VT and VF was observed.

### 3.5. Plasma LDH

The biochemical indicator of cellular damage (LDH release) was examined in animals with a 5-min coronary artery occlusion followed by a 30-min reperfusion period. Blood samples were collected at the end of the 30-min reperfusion period. LDH activities was low in sham-operated animals with and without resveratrol preinfusion ( $102.5 \pm 34.6$  and  $103.9 \pm 15.9$  U/l, respectively). In the operated animals without resveratrol preinfusion, the LDH activity was increased to  $298.4 \pm 21.4$  U/l. Resveratrol dose dependently reduced the LDH activity; at a resveratrol dose of  $2.3 \times 10^{-5}$  g/kg, the LDH activity was reduced to  $126.3 \pm 17.6$ , a value that was quite close to that of the sham-operated animals (Table 3).

### 3.6. Release of NO

NO release was measured by the presence of nitrite ( $\text{NO}_2^-$ ) and nitrate ( $\text{NO}_3^-$ ) in the plasma. In sham-operated animals, plasma NO was  $6.9 \pm 0.6$  and  $13.2 \pm 2.2$   $\mu\text{mol/l}$  without and with resveratrol preinfusion, respectively. In the operated animals, resveratrol exerted a dose-dependent

Table 2  
Effect of resveratrol on reperfusion (30 min) induced arrhythmias in anesthetized rats<sup>a</sup>

|                                            | Ventricular tachycardia |              | Ventricular fibrillation |              | Mortality (%) |
|--------------------------------------------|-------------------------|--------------|--------------------------|--------------|---------------|
|                                            | Incidence (%)           | Duration (s) | Incidence (%)            | Duration (s) |               |
| Sham                                       |                         |              |                          |              |               |
| Vehicle [4]                                | –                       | –            | –                        | –            | –             |
| Resveratrol $2.3 \times 10^{-5}$ g/kg (4)  | –                       | –            | –                        | –            | –             |
| Operated                                   |                         |              |                          |              |               |
| Vehicle (10)                               | 100                     | 35.9±8.9     | 80                       | 71.6±26.4    | 50            |
| Resveratrol $2.3 \times 10^{-7}$ g/kg (8)  | 50*                     | 22.6±17.8    | 38                       | 17.9±9.1     | 13            |
| Resveratrol $2.3 \times 10^{-6}$ g/kg (8)  | 50*                     | 4.7±2.2**    | 13*                      | 0.5±0.5*     | 0*            |
| Resveratrol $2.3 \times 10^{-5}$ g/kg (10) | 20**                    | 0.4±0.4**    | 0**                      | 0.0±0.0**    | 0*            |

<sup>a</sup> Vehicle is 0.1% DMSO in normal saline; (n), number of experiments; values for duration of VT and VF are shown as the mean±S.E. Statistical difference at the level of \*  $P < 0.05$  and \*\*  $P < 0.01$ , as compared with vehicle.

Table 3  
Effects of resveratrol on NO ( $\mu\text{mol/l}$ ) and LDH (U/l) release during the end period of reperfusion<sup>a</sup>

| Treatment                             | NO               | LDH                |
|---------------------------------------|------------------|--------------------|
| Sham                                  |                  |                    |
| Vehicle                               | 6.9 $\pm$ 0.6    | 103.9 $\pm$ 15.9   |
| Resveratrol $2.3 \times 10^{-5}$ g/kg | 13.2 $\pm$ 2.2*  | 102.5 $\pm$ 34.6   |
| Operated                              |                  |                    |
| Vehicle                               | 7.9 $\pm$ 1.2    | 298.4 $\pm$ 21.4   |
| Resveratrol $2.3 \times 10^{-7}$ g/kg | 13.0 $\pm$ 3.8   | 284.9 $\pm$ 41.4   |
| Resveratrol $2.3 \times 10^{-6}$ g/kg | 17.5 $\pm$ 1.4** | 178.4 $\pm$ 20.2** |
| Resveratrol $2.3 \times 10^{-5}$ g/kg | 27.1 $\pm$ 2.6** | 126.3 $\pm$ 17.6** |

<sup>a</sup> Vehicle is 0.1% DMSO in normal saline; data are presented as mean $\pm$ S.E. ( $n=6$ ). Statistical difference at the level of \*  $P<0.05$  and \*\*  $P<0.01$ , as compared with vehicle.

increase of plasma NO; at a resveratrol dose of  $2.3 \times 10^{-5}$  g/kg, there was a 4-fold increase compared to that of the uninfused animals (Table 3).

#### 4. Discussion

Several epidemiological studies have suggested that the mortality rate from coronary heart disease can be decreased by moderate consumption of alcohol, particularly red wines [1,2]. Resveratrol, a polyphenolic antioxidant found in the skin of grapes and relatively abundant in red wine, has been thought to be the major component responsible for such epidemiological observations [3]. In the present study, we explored the possible use of resveratrol as a therapeutic drug in treating acute scenarios such as I–R injury.

An important consequence of both myocardial ischemia and reperfusion is the occurrence of various disturbances of cardiac rhythm, including the potential lethal condition of VF [23]. What remains to be established is which of many complex molecular changes that occur during I–R is critical to the initiation of electrophysiological instability. In recent years, many cardiac biochemical changes have been suggested as potential culprits, these include unfavorable redistribution and accumulation of ions through  $\text{Na}^+$ / $\text{H}^+$  exchange [24],  $\text{Na}^+$ ,  $\text{Ca}^{2+}$  and ATP-sensitive  $\text{K}^+$  channels [25], the release of catecholamines, cAMP [26], changes in the availability of glycolytically produced ATP [27], the accumulation of fatty acids and membrane lysophosphatides [28], expression of platelet activating factor [29] and production of free radicals [13], and the activation of the  $\alpha, \beta$ -receptor [30].

In the present study, we showed that in anesthetized rats the administration of resveratrol prior to coronary artery occlusion and I–R had no protective effect on ischemia-induced arrhythmias, nor on mortality. In contrast, a dramatic protective effect was observed in I–R-induced arrhythmias and mortality. Though small amounts of free radical formation could occur under normal or ischemic

conditions, far greater production took place during the early period of reperfusion [13]. The absence of protective activities against ischemia-induced arrhythmia and mortality suggests that free radical generation is not an important factor responsible for the induction of cardiac arrhythmia during the ischemic period. Mechanisms such as acidosis, extracellular  $\text{K}^+$  accumulation [31], inhomogeneous change of membrane excitability and conductivity in ischemic region [32] and the consequent generation of reentrant and nonreentrant arrhythmia should be considered. During the early postischemic reperfusion period, a burst of free radical generation cannot be adequately counteracted by the cardiac antioxidant mechanism which may then lead to significant myocardial injury [12,23]. In this regard, several reports have shown that some antioxidants, such as xanthine oxidase inhibitors [33], superoxide dismutase [34], and vitamin E [35] possess antiarrhythmic activity during reperfusion. Recently, it has been shown that resveratrol-treated hearts were resistant to I–R injury as evidenced by improved postischemic ventricular function and reduced infarct size on isolated perfused working rat heart and the effect was attributed to its peroxy radical scavenging activity [36]. Though we do not have direct evidence to prove that enough free radicals were generated during 5 min ischemia followed by the 30-min reperfusion period, a report that used the same experimental protocols proves that the reperfusion damage of cardiac tissue can be prevented by allopurinol, a xanthine oxidase inhibitor [21]. This result indicates that the generation of superoxide anion may occur in this condition. Moreover, a prominent production of free radicals after 15 s of reperfusion was found in the isolated rabbit heart subjected to a short period (i.e. 10 min) ischemia [37]. In the present study, resveratrol was found to have in vitro DPPH scavenging activity and in vivo cardioprotective activity. However, the effective concentrations of resveratrol in DPPH scavenging activity ( $\text{IC}_{0.2000}=7.0 \mu\text{M}$ ) in this study and other antioxidant activities in other reports [38] were far greater than the effective concentration for cardioprotective activity in the I–R rats by assuming that the infused resveratrol was remaining in the circulation. If the animal blood volume is 100 ml/kg by weight, and the highest quantity of infused resveratrol in the present study is  $2.3 \times 10^{-5}$  g/kg, the calculated concentration is 1  $\mu\text{M}$ . One possible reason for the discrepancy in effective concentration for in vitro antioxidant activity and in vivo cardioprotective effect is the selective accumulation of resveratrol in cardiac tissue or membrane which then effectively prevents the membrane damage caused by free radicals. This possibility was proved by a significant cardiac accumulation in rat after chronic oral administration with red wine [39,40]. Another reason for the more effective cardioprotection is the enhancement of NO production by resveratrol (Table 3). In accordance with this speculation, the release of LDH during the same reperfusion period is decreased.

Currently, it is not clear where the increased NO originates (cardiomyocytes and/or endothelial cells of vascular bed and cardiac chamber), nor is it clear whether the increased NO production is due to the inhibition of NO interaction with superoxide anion to form peroxynitrite or enhancement of NOS activity. Numerous studies have shown both beneficial and harmful effects of NO in the cardiovascular system. NO is a free radical itself and can also form peroxynitrite, a potent oxidant that can potentially cause membrane lipid peroxidation leading to myocardial dysfunction [41,42]. In contrast, NO relaxes vascular smooth muscle and could be cardioprotective against I–R injury through coronary vasodilatation and reduction of myocardial oxygen consumption via upregulation of cGMP [43]. Pretreatment with NO donors has been reported to be beneficial in the ischemic myocardium. Both antiarrhythmic and anti-infarction [44] effects of the NO donors have been well documented. More recently NO has been appreciated as the possible key trigger and mediator for ischemic preconditioning [45]. Thus, it may be assumed that part of the anti-I–R-induced arrhythmia effect of resveratrol is probably attributable to its upregulation of NO production. Though NO production in sham-operated animals was increased by infusion with  $2.3 \times 10^{-5}$  g/kg resveratrol, the blood pressure was unchanged. This result suggests that other compensatory vasoconstrictor mechanisms may counterbalance the vasorelaxant effect of NO. Another possibility is the increased NO production in the systemic cardiovascular system does not reach effective concentration for induction of vascular relaxation. In reperfusion animals, the presence of resveratrol would cause a more prominent increase of NO production (Table 3). Whether the increase of NO contributes to the antiarrhythmic activity of resveratrol remains to be clarified. However, the antioxidant activity of resveratrol may prevent the formation more toxic peroxynitrite from the interaction of NO with superoxide anion which then will contribute to the increase of NO level.

## 5. Conclusions

In conclusion, our data indicate that preinfusion of resveratrol is effective to prevent reperfusion-induced arrhythmias and mortality. This protective effects on arrhythmias and cardiac cells damage by resveratrol may be associated with its antioxidant activity, free radicals scavenging activity and enhanced NO release during the reperfusion period.

## Acknowledgements

The authors thank Dr. G.J. Chang and Mr. W.P. Cheng for technical assistance. This work was supported by

grants from the National Science Council, Taiwan (NSC 88-2314-B-182-006 and NSC-88-2314-B-002-M48).

## References

- [1] Renaud S, de Lorgeril M. Wine, alcohol, platelets, and the French paradox for coronary heart disease. *Lancet* 1992;339:1523–1526.
- [2] Renaud SC, Gueguen R, Schenker J, d'Houtaud A. Alcohol and mortality in middle-aged men from Eastern France. *Epidemiology* 1998;9:184–188.
- [3] Constant J. Alcohol, ischemic heart disease, and the French paradox. *Coron Artery Dis* 1997;8:645–649.
- [4] Arichi H, Kimura Y, Okuda H, Baba K, Kozawa M, Arichi S. Effects of stilbene components of the roots of polygonum on lipid metabolism. *Chem Pharm Bull* 1982;30:1766–1770.
- [5] Kimura Y, Okuda H, Arichi S. Effects of stilbene derivatives on arachidonate metabolism in leukocytes. *Biochim Biophys Acta* 1985;837:209–212.
- [6] Ragazzi E, Frolidi G, Fassina G. Resveratrol activity on guinea pig isolated trachea from normal and albumin-sensitized animals. *Pharmacol Res Commun* 1988;20:79–82.
- [7] Bertelli AA, Giovannini L, Giannessi D et al. Antiplatelet activity of synthetic and natural resveratrol in red wine. *Int J Tissue React* 1995;17:1–3.
- [8] Jayatilake GS, Jayasuriya H, Lee ES et al. Kinase inhibitors polygonum cuspidatum. *J Nat Prod* 1993;56:1805–1810.
- [9] Rotondo S, Rajtar G, Manarinis S et al. Effect of *trans*-resveratrol, a natural polyphenolic compound, on human polymorphonuclear leukocyte function. *Br J Pharmacol* 1998;123:1691–1699.
- [10] Frankel EN, Waterhouse AL, Kinsella JE. Inhibition of human LDL oxidation by resveratrol. *Lancet* 1993;341:1103–1104.
- [11] Hearse DJ. Myocardial ischemia: can we agree on a definition for the 21st century? *Cardiovasc Res* 1994;28:1737–1744.
- [12] Robicsek F, Schaper J. Reperfusion injury: fact or myth? *J Cardiac Surg* 1997;12:133–137.
- [13] Zweier JL. Measurement of superoxide-derived free radicals in the reperfused heart: evidence for a free radical mechanism of reperfusion injury. *J Biol Chem* 1988;263:1353–1357.
- [14] Brooks WW, Conarad CH, Morgan JP. Reperfusion induced arrhythmias following ischemia in intact rat heart: role of intracellular calcium. *Cardiovasc Res* 1995;29:536–542.
- [15] Fitzpatrick DF, Hirschfield SL, Coffey RG. Endothelium-dependent vasorelaxing activity of wine and other grape products. *Am J Physiol* 1993;265:H774–H778.
- [16] Thakkar K, Geahlen RL, Cushman M. Synthesis and protein-tyrosine kinase inhibitory activity of polyhydroxylated stilbene analogues of piceatannol. *J Med Chem* 1993;36:2950–2955.
- [17] Mellors A, Tappel AL. The inhibition of mitochondria by ubiquinone and ubiquinol. *J Biol Chem* 1966;241:4353–4356.
- [18] Smith, 3rd EF, Griswold DE, Egan JW, Hillegass LM, Dimartino MJ. Reduction of myocardial damage and polymorphonuclear leukocyte accumulation following coronary artery occlusion and reperfusion by the thromboxane receptor antagonist BM 13.505. *J Cardiovasc Pharm* 1989;13:715–722.
- [19] Walker MJ, Curtis MJ, Hearse DJ et al. The Lambeth Conventions: guidelines for the study of arrhythmias in ischemia infarction, and reperfusion. *Cardiovasc Res* 1988;22:447–455.
- [20] Archer J. Measurement of nitric oxide in biological models. *FASEB J* 1993;7:349–360.
- [21] Manning AS, Coltart DJ, Hearse DJ. Ischemia and reperfusion-induced arrhythmias in the rat: effects of xanthine oxidase inhibition with allopurinol. *Circ Res* 1984;55:545–548.
- [22] Kusama Y, Bernier M, Hearse DJ. Exacerbation of reperfusion arrhythmias by sudden oxidant stress. *Circ Res* 1990;67:481–489.

- [23] Corr PB, Witkowski FX. Potential electrophysiologic mechanisms responsible for dysrhythmias associated with reperfusion of ischemic myocardium. *Circulation* 1983;68:116–124.
- [24] Levitsky J, Gurell D, Frishman WH. Sodium ion/hydrogen ion exchange inhibition: a new pharmacologic approach to myocardial ischemia and reperfusion injury. *J Clin Pharmacol* 1998;38:887–897.
- [25] Pierce GN, Czubryt MP. The contribution of ionic imbalance to ischemia–reperfusion-induced injury. *J Mol Cell Cardiol* 1995;27:53–63.
- [26] Du Toit EF, Muller CA, McCarthy J, Opie LH. Levosimendan: effects of a calcium sensitizer on function and arrhythmias and cyclic nucleotide levels during ischemia–reperfusion in the Langendorff-perfused guinea pig heart. *J Pharmacol Exp Ther* 1999;290:505–514.
- [27] de Jong JW, Cargnoni A, Bradamante S et al. Intermittent vs. continuous ischemia decelerates adenylate breakdown and prevents norepinephrine release in reperfused rabbit heart. *J Mol Cell Cardiol* 1995;27:659–671.
- [28] Das DK, Engelman RM, Rousou JA, Breyer RH, Otani H, Lemeshow S. Role of membrane phospholipids in myocardial injury induced by ischemia and reperfusion. *Am J Physiol* 1986;251:H71–H79.
- [29] Montrucchio G, Alloatti G, Mariano F et al. Role of platelet-activating factor in polymorphonuclear neutrophil recruitment in reperfused ischemic rabbit heart. *Am J Pathol* 1993;142:471–480.
- [30] Flesch M, Maack C, Cremers B, Bäumer AT, Südkamp M, Böhm M. Effect of  $\beta$ -blockers on free radical-induced cardiac contractile dysfunction. *Circulation* 1999;100:346–353.
- [31] Wilde AAM, Kléber AG. The combined effects of hypoxia, high  $K^+$  and acidosis on the intracellular sodium activity and resting potential in guinea pig papillary muscle. *Circ Res* 1986;58:249–256.
- [32] Pogwizd SM, Corr PB. Reentrant and Nonreentrant mechanisms contribute to arrhythmogenesis during early myocardial ischemia: Results using three-dimensional mapping. *Circ Res* 1987;61:352–371.
- [33] Hawes EM, Watts JA. Xanthine oxidase/dehydrogenase release following ischemia in isolated rat hearts. *Am J Cardiovasc Pathol* 1993;4:326–335.
- [34] Wang P, Chen H, Win H et al. Overexpression of human copper, zinc-superoxide dismutase (SOD 1) prevents postischemic injury. *Proc Natl Acad Sci USA* 1998;98:4556–4560.
- [35] Kramer JH, Misik V, Weglicki WB. Magnesium-deficiency potentiates free radical production associated with postischemic injury to rat hearts: vitamin E affords protection. *Free Radical Bio Med* 1994;16:713–723.
- [36] Ray PS, Maulik G, Cordis GA, Bertelli AAE, Bertelli A, Das DK. The red wine antioxidant resveratrol protects isolated rat hearts from ischemia reperfusion injury. *Free Radical Bio Med* 1999;27:160–169.
- [37] Zweier JL, Kuppusamy P, Williams R et al. Measurement and characterization of postischemic free radical generation in the isolated perfused heart. *J Biol Chem* 1989;264:18890–18895.
- [38] Belguendouz L, Fremont L, Linard A. Resveratrol inhibits metal ion-dependent and independent peroxidation of porcine low-density lipoproteins. *Biochem Pharmacol* 1997;53:1347–1355.
- [39] Bertelli AAE, Giovannini L, Stradi R, Urien S, Tillement JP, Bertelli A. Kinetics of *trans*- and *cis*-resveratrol (3,4',5-trihydroxystilbene) after red wine oral administration in rats. *Int J Clin Pharmacol Res* 1996;XVI:77–81.
- [40] Bertelli A, Bertelli AAE, Gozzini A, Giovannini L. Plasma and tissue resveratrol concentrations and pharmacological activity. *Drug Exp Clin Res* 1998;24:133–138.
- [41] Maulik N, Engelman DT, Watanabe M et al. Nitric oxide signaling in ischemic heart. *Cardiovasc Res* 1995;30:593–601.
- [42] Wang P, Zweier JL. Measurement of nitric oxide and peroxynitrite generation in the postischemic heart: evidence for peroxynitrite-mediated reperfusion injury. *J Biol Chem* 1996;271:29223–29230.
- [43] Weiss HR, Rodriguez E, Tse J, Scholz PM. Effect of increased myocardial cyclic GMP induced by cyclic GMP-phosphodiesterase inhibition on oxygen consumption and supply of rabbit hearts. *Clin Exp Pharmacol Physiol* 1994;21:607–614.
- [44] Nakanishi K, Vinten-Johansen J, Lefer DJ et al. Intracoronary L-arginine during reperfusion improves endothelial function and reduces infarct size. *Am J Physiol* 1992;263:H1650–H1658.
- [45] Qiu Y, Rizvi A, Tand X-L et al. Nitric oxide triggers late preconditioning against myocardial infarction in conscious rabbits. *Am J Physiol* 1997;273:H2931–H2936.
